# Supplementary material for: Changes in Nut Consumption and Subsequent Cardiovascular Disease Risk Among US Men and Women: 3 Large Prospective Cohort Studies
Source: PubMed Central journal article supplement — J Am Heart Assoc. 2020 Apr 1;9(7):e013877. doi: 10.1161/JAHA.119.013877 (PMC7428648; doi:10.1161/jaha.119.013877), 2020-04-01
Supplement: JAH3-9-e013877-s001.pdf [file JAH3-9-e013877-s001.pdf]

# **SUPPLEMENTAL MATERIAL**

**Table S1. Multivariable adjusted relative risk (95% confidence intervals) for incident cardiovascular disease according to the joint categories of total nuts intake at the first and fourth year of each period in NHS, NHS II, and HPFS.**

| 1 <sup>st</sup> year intakes | Total nuts intake (serving/day) |                     |                     |                     |                     |                     |                     |                     |                     |
|------------------------------|---------------------------------|---------------------|---------------------|---------------------|---------------------|---------------------|---------------------|---------------------|---------------------|
|                              | 0                               | 0.1-0.49            | ≥0.5                | 0                   | 0.1-0.49            | ≥0.5                | 0                   | 0.1-0.49            | ≥0.5                |
| 4 <sup>th</sup> year intakes | 0                               | 0                   | 0                   | 0.1-0.49            | 0.1-0.49            | 0.1-0.49            | ≥0.5                | ≥0.5                | ≥0.5                |
| <b>HPFS</b>                  |                                 |                     |                     |                     |                     |                     |                     |                     |                     |
| Person Years                 | 61875                           | 47484               | 3988                | 53113               | 187483              | 33991               | 6949                | 46258               | 44362               |
| Cases                        | 487                             | 361                 | 28                  | 370                 | 1205                | 245                 | 47                  | 295                 | 254                 |
| Crude rate                   | 787                             | 760                 | 702                 | 697                 | 643                 | 721                 | 676                 | 638                 | 573                 |
| Model 1                      | 1.0<br>(ref.)                   | 1.00<br>(0.88-1.15) | 0.78<br>(0.53-1.15) | 0.91<br>(0.79-1.04) | 0.87<br>(0.78-0.97) | 0.90<br>(0.77-1.05) | 0.81<br>(0.60-1.09) | 0.79<br>(0.68-0.91) | 0.69<br>(0.59-0.81) |
| Model 2                      | 1.0<br>(ref.)                   | 1.03<br>(0.89-1.18) | 0.82<br>(0.56-1.21) | 0.94<br>(0.82-1.08) | 0.92<br>(0.83-1.02) | 0.97<br>(0.83-1.13) | 0.86<br>(0.63-1.16) | 0.86<br>(0.74-0.99) | 0.77<br>(0.66-0.89) |
| Model 3                      | 1.0<br>(ref.)                   | 1.02<br>(0.89-1.17) | 0.81<br>(0.55-1.19) | 0.94<br>(0.82-1.07) | 0.91<br>(0.81-1.01) | 0.95<br>(0.81-1.1)  | 0.85<br>(0.63-1.15) | 0.85<br>(0.73-0.99) | 0.77<br>(0.65-0.90) |
| <b>NHS</b>                   |                                 |                     |                     |                     |                     |                     |                     |                     |                     |
| Person Years                 | 345186                          | 164227              | 9989                | 176580              | 352732              | 46207               | 19123               | 73350               | 49085               |
| Cases                        | 1447                            | 623                 | 47                  | 600                 | 1134                | 150                 | 65                  | 231                 | 136                 |
| Crude rate                   | 419                             | 379                 | 471                 | 340                 | 321                 | 325                 | 340                 | 315                 | 277                 |
| Model 1                      | 1.0<br>(ref.)                   | 0.96<br>(0.88-1.06) | 1.04<br>(0.78-1.40) | 0.84<br>(0.76-0.92) | 0.85<br>(0.78-0.92) | 0.77<br>(0.65-0.91) | 0.72<br>(0.56-0.93) | 0.71<br>(0.62-0.82) | 0.59<br>(0.49-0.70) |
| Model 2                      | 1.0<br>(ref.)                   | 1.03<br>(0.93-1.13) | 1.14<br>(0.85-1.53) | 0.91<br>(0.82-1.00) | 0.97<br>(0.89-1.05) | 0.91<br>(0.77-1.08) | 0.83<br>(0.65-1.07) | 0.86<br>(0.74-0.99) | 0.74<br>(0.61-0.88) |
| Model 3                      | 1.0<br>(ref.)                   | 1.02<br>(0.93-1.12) | 1.15<br>(0.86-1.54) | 0.91<br>(0.82-1.00) | 0.97<br>(0.89-1.05) | 0.92<br>(0.77-1.09) | 0.85<br>(0.66-1.09) | 0.88<br>(0.76-1.01) | 0.76<br>(0.63-0.92) |
| <b>NHSII</b>                 |                                 |                     |                     |                     |                     |                     |                     |                     |                     |
| Person Years                 | 311193                          | 115799              | 5055                | 191070              | 299703              | 33812               | 22711               | 72669               | 41764               |
| Cases                        | 201                             | 61                  | 2                   | 135                 | 222                 | 31                  | 13                  | 49                  | 21                  |
| Crude rate                   | 65                              | 53                  | 40                  | 71                  | 74                  | 92                  | 57                  | 67                  | 50                  |
| Model 1                      | 1.0<br>(ref.)                   | 0.74<br>(0.56-0.99) | 0.39<br>(0.10-1.59) | 0.93<br>(0.74-1.15) | 0.85<br>(0.70-1.04) | 0.84<br>(0.57-1.24) | 0.62<br>(0.35-1.09) | 0.65<br>(0.47-0.89) | 0.42<br>(0.27-0.67) |
| Model 2                      | 1.0<br>(ref.)                   | 0.74<br>(0.56-0.99) | 0.39<br>(0.10-1.59) | 0.97<br>(0.77-1.20) | 0.91<br>(0.74-1.11) | 0.94<br>(0.63-1.39) | 0.70<br>(0.39-1.23) | 0.75<br>(0.54-1.04) | 0.50<br>(0.32-0.80) |
| Model 3                      | 1.0<br>(ref.)                   | 0.74<br>(0.55-0.99) | 0.40<br>(0.10-1.63) | 0.96<br>(0.77-1.20) | 0.92<br>(0.75-1.13) | 0.98<br>(0.66-1.46) | 0.73<br>(0.41-1.28) | 0.79<br>(0.56-1.10) | 0.58<br>(0.36-0.93) |

**Model 1** was stratified by age, sex, and calendar year in 4-year intervals;

**Model 2** was stratified by age, sex, and calendar year in 4-year intervals, further adjusted for initial total nut intake, race (white, non-white), family history of MI, initial and change in smoking status (never to never, never to current, past to past, current to past, current to current, missing indicator), menopausal status and postmenopausal hormone use (premenopausal, postmenopausal + current use, postmenopausal + past use, postmenopausal + never use, missing indicator, in NHS and NHSII), number of tooth at baseline (0, 1-16, 17-24, 25-32, in NHS and HPFS) and updated teeth loss during follow-up (continuous, in NHS and HPFS), oral contraceptive use (never, current, past, missing indicator, in NHSII), initial (g/d, 0, 0.1-4.9, 5-14.9, 15-29.9 and ≥30) and change in alcohol intake (decrease, no-change or increase), initial (MET-h/week, quintiles) and change in physical activity level (MET-h/week, <-5, -5~4.9, ≥5). **Model 3** was model 2 further adjusted for initial BMI (<21.0, 21.0-24.9, 25.0-29.9, 30.0-31.9, >32.0 kg/m<sup>2</sup>), initial history of hypercholesterolemia and high blood pressure at the start of each 4-year interval, initial (quintiles) and changes in energy intakes (kcal/day: <-250, -250~250, ≥250), initial (calculated without the alcohol component and nuts, quintile) and change in AHEI score (<-2, -2~5, ≥5) over each 4-year period

**Table S2. Stratified analysis of the multivariable adjusted relative risk (RR, 95% confidence intervals) for incident cardiovascular disease associated with per 0.5 serving/day increase of total nuts based on pooled data of NHS, NHS II, and HPFS.**

| Stratified variables                | CVD   |                  | CHD   |                  | Stroke |                  |
|-------------------------------------|-------|------------------|-------|------------------|--------|------------------|
|                                     | Cases | RR (95%CI)       | Cases | RR (95%CI)       | Cases  | RR (95%CI)       |
| <b>Age (years)</b>                  |       |                  |       |                  |        |                  |
| < 60                                | 1634  | 0.90 (0.81-1.00) | 1007  | 0.90 (0.79-1.03) | 627    | 0.90 (0.76-1.07) |
| ≥ 60                                | 6826  | 0.92 (0.87-0.96) | 3970  | 0.94 (0.89-0.99) | 2856   | 0.88 (0.82-0.95) |
| <i>P</i> for interaction            |       | 0.35             |       | 0.24             |        | 0.99             |
| <b>Smoking status</b>               |       |                  |       |                  |        |                  |
| Never smoking                       | 3550  | 0.94 (0.88-1.00) | 2023  | 0.92 (0.85-1.00) | 1527   | 0.96 (0.88-1.06) |
| Ever smoking                        | 4840  | 0.89 (0.84-0.94) | 2911  | 0.95 (0.88-1.02) | 1929   | 0.81 (0.73-0.88) |
| <i>P</i> for interaction            |       | 0.15             |       | 0.74             |        | 0.008            |
| <b>Changes of alcohol intake</b>    |       |                  |       |                  |        |                  |
| No changes or decreased             | 5889  | 0.91 (0.87-0.96) | 3422  | 0.93 (0.88-1.00) | 2467   | 0.88 (0.81-0.95) |
| Increased                           | 2571  | 0.92 (0.85-0.98) | 1555  | 0.93 (0.85-1.02) | 1016   | 0.89 (0.79-1.00) |
| <i>P</i> for interaction            |       | 0.71             |       | 0.81             |        | 0.78             |
| <b>Changes of physical activity</b> |       |                  |       |                  |        |                  |
| No changes or decreased             | 4009  | 0.92 (0.86-0.97) | 2444  | 0.91 (0.84-0.98) | 1565   | 0.93 (0.84-1.02) |
| Increased                           | 3154  | 0.96 (0.89-1.03) | 1933  | 0.98 (0.90-1.07) | 1221   | 0.92 (0.82-1.03) |
| <i>P</i> for interaction            |       | 0.34             |       | 0.33             |        | 0.77             |
| <b>Changes of energy intake</b>     |       |                  |       |                  |        |                  |
| No changes or decreased             | 4445  | 0.92 (0.86-0.99) | 2622  | 0.93 (0.86-1.01) | 1823   | 0.90 (0.82-1.00) |
| Increased                           | 4015  | 0.91 (0.86-0.96) | 2355  | 0.93 (0.86-0.99) | 1660   | 0.88 (0.81-0.96) |
| <i>P</i> for interaction            |       | 0.53             |       | 0.71             |        | 0.59             |
| <b>Changes of AHEI score</b>        |       |                  |       |                  |        |                  |
| No changes or decreased             | 3793  | 0.89 (0.84-0.95) | 2243  | 0.91 (0.84-0.99) | 1550   | 0.86 (0.78-0.96) |
| Increased                           | 4667  | 0.93 (0.88-0.98) | 2734  | 0.95 (0.88-1.01) | 1933   | 0.90 (0.83-0.98) |
| <i>P</i> for interaction            |       | 0.31             |       | 0.45             |        | 0.46             |
| <b>Changes of body weight</b>       |       |                  |       |                  |        |                  |
| No changes or decreased             | 4058  | 0.91 (0.86-0.97) | 2393  | 0.91 (0.85-0.99) | 1665   | 0.91 (0.83-1.00) |
| Increased                           | 3446  | 0.91 (0.85-0.97) | 1988  | 0.96 (0.88-1.05) | 1458   | 0.84 (0.75-0.93) |
| <i>P</i> for interaction            |       | 0.98             |       | 0.64             |        | 0.57             |

Multivariate adjusted model was stratified by age, sex, and calendar year in 4-year intervals and adjusted for initial total nut intake, race (white, non-white), family history of MI, initial and change in smoking status (never to never, never to current, past to past, current to past, current to current, missing indicator), menopausal status, postmenopausal hormone use (premenopausal, postmenopausal + current use, postmenopausal + past use, postmenopausal + never use, missing indicator, in NHS and NHSII), number of tooth at baseline (0, 1-16, 17-24, 25-32, in NHS and HPFS) and updated teeth loss during follow-up (continuous, in NHS and HPFS), oral contraceptive use (never, current, past, missing indicator, in NHSII), initial (g/d, 0, 0.1-4.9, 5-14.9, 15-29.9 and ≥30) and change in alcohol intake (decrease, no-change or increase), initial (MET-h/week, quintiles) and change in physical activity level (MET-h/week, <-5, -5~4.9, ≥5), initial BMI (<21.0, 21.0-24.9, 25.0-29.9, 30.0-31.9, >32.0 kg/m<sup>2</sup>), initial (quintiles) and changes in energy intakes (kcal/day: <-250, -250~250, ≥250), initial (calculated without the alcohol component and nuts, quintile) and change in AHEI score (<-2, -2~5, ≥5) over each 4-year period, and initial history of hypercholesterolemia and high blood pressure at the start of each 4-year interval, with the exclusion of stratified variable.

<sup>\*</sup>*P* for interaction between the initial year and the fourth-year nut consumption over each 4-year period

**Figure S1. Multivariable adjusted relative risk and 95% confidence intervals for incident cardiovascular disease associated with substitution of 0.5 serving of nuts with equal amount of other food items.**

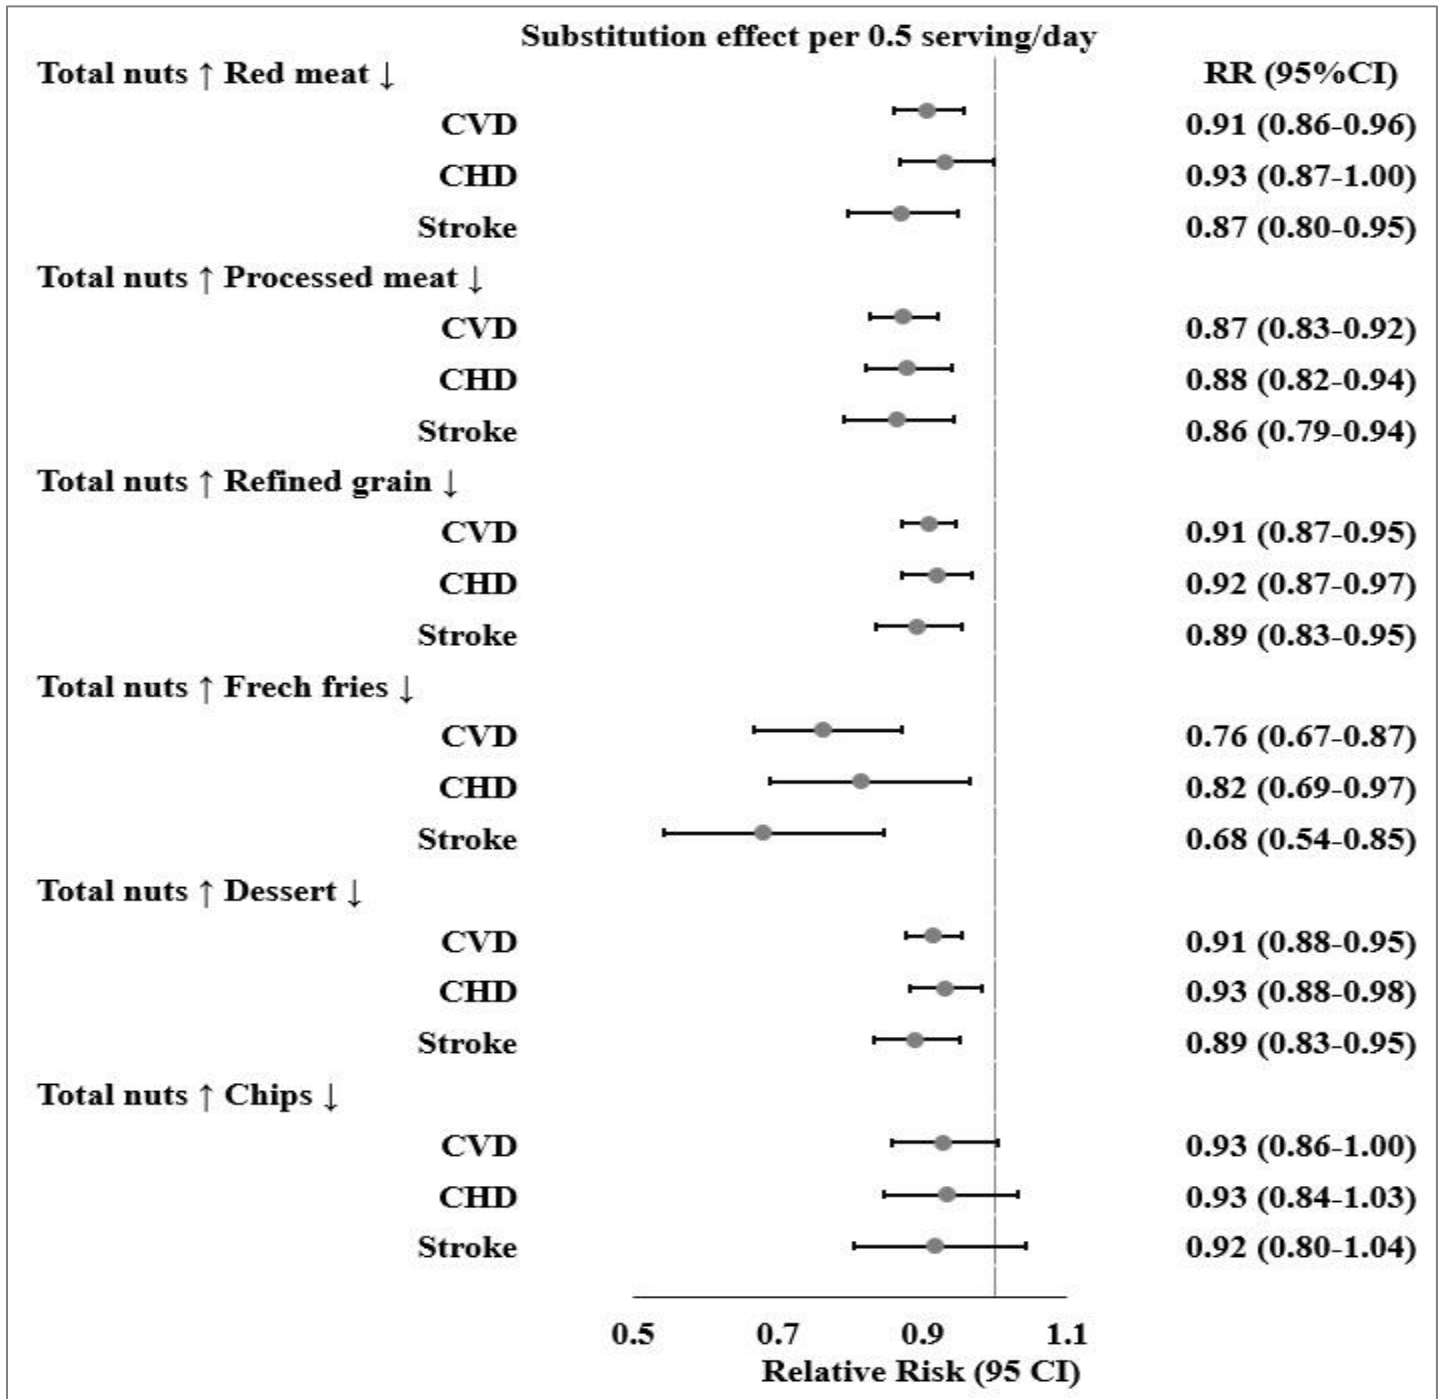

Multi-variables model stratified by age, sex, and calendar year in 4-year intervals, and adjusted initial total nut intake, race (white, non-white), family history of MI, initial and change in smoking status (never to never, never to current, past to past, current to past, current to current, missing indicator), menopausal status and postmenopausal hormone use (premenopausal, postmenopausal + current use, postmenopausal + past use, postmenopausal + never use, missing indicator, in NHS and NHSII), number of tooth at baseline (0, 1-16, 17-24, 25-32, in NHS and HPFS) and updated teeth loss during follow-up (continuous, in NHS and HPFS), oral contraceptive use (never, current, past, missing indicator, in NHSII), initial (g/d, 0, 0.1-4.9, 5-14.9, 15-29.9 and  $\geq 30$ ) and change in alcohol intake (decrease, no-change or increase), initial (MET-h/week, quintiles) and change in physical activity level (MET-h/week,  $< -5$ ,  $-5 \sim -4.9$ ,  $\geq 5$ ), initial BMI ( $< 21.0$ ,  $21.0 \sim 24.9$ ,  $25.0 \sim 29.9$ ,  $30.0 \sim 31.9$ ,  $> 32.0$  kg/m<sup>2</sup>), initial history of hypercholesterolemia and high blood pressure at the start of each 4-year interval, initial energy intake (quintiles) as well as initial (continuous) and changes (continuous) in red meat, processed meat, whole grain, refined grain, French fries, dessert and chips.
